# Supplementary material for: The prion protein regulates beta-amyloid-mediated self-renewal of neural stem cells in vitro
Source: PubMed Central journal article supplement (PMC4435829; doi:10.1186/s13287-015-0067-4), 2015-04-11

**Additional file 4: Baseline comparisons of KO and WT cells.**

Quantification of basal KO and WT signal from NSCs differentiated for seven days (**A-C**) and NSCs incubated for 24 hours on the laminin/PDL matrix in proliferation media before differentiation for seven days (**D-F**) when western blotted for nestin (**A, D**), NF-L (**B, E**) or GFAP (**C, F**). Baseline rates of calcium influx (**G**), MTS metabolism (**H**) and detection of cellular ATP levels (**I**). Quantification of the basal signal from KO and WT NSCs western blotted for TOMM22 (**J**), Pin1 (**K**) and p53 (**L**). All western blot quantifications are expressed as band densitometry relative to the coomassie protein stain for protein loading.

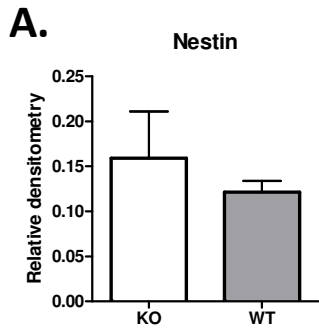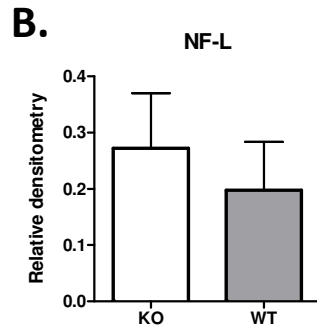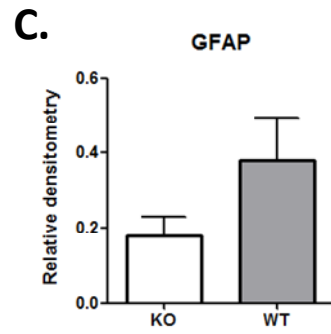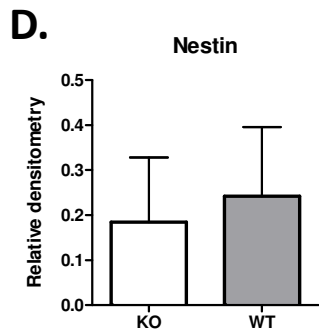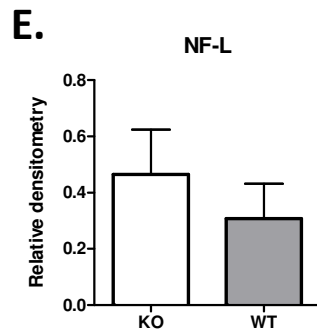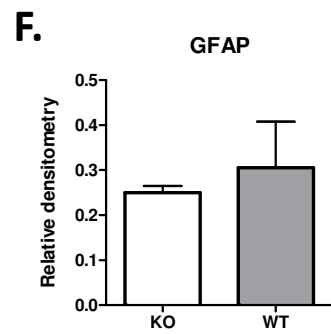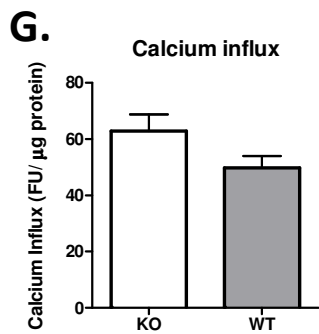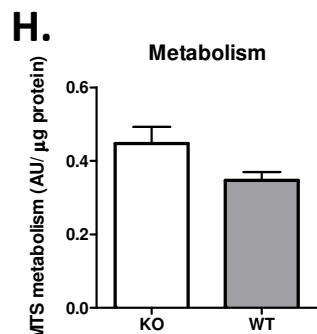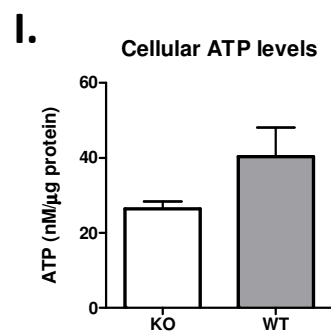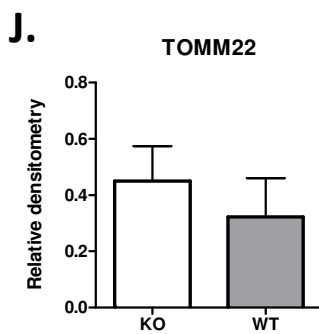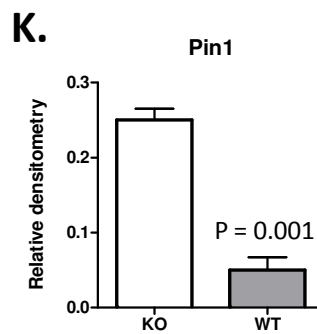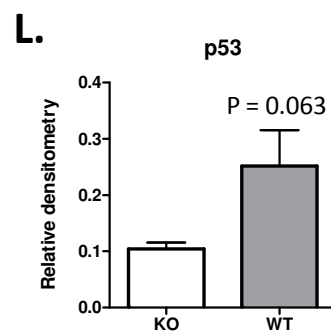

Supplement: 13287_2015_67_MOESM4_ESM.pdf [file 13287_2015_67_MOESM4_ESM.pdf]
