# Supplementary material for: The prion protein regulates beta-amyloid-mediated self-renewal of neural stem cells in vitro
Source: PubMed Central journal article supplement (PMC4435829; doi:10.1186/s13287-015-0067-4), 2015-04-11

## Additional file 2: A $\beta$ toxicity.

**A.** Morphology of KO and WT NSCs treated for 24 hours with 1  $\mu$ M A $\beta$ . KO and WT cells have a differing morphology but no overt A $\beta$  changes were observed. Scale bar = 20  $\mu$ m. **B.** Cells were plated on a laminin/PDL matrix and treated for 7 days with a doubling dilution of A $\beta$ 1-42 in proliferation media. On day seven, cells were assayed for metabolism using prestoblue dye (Invitrogen) as per the product protocol. Following metabolism assay the cells were lysed and LDH was assayed in media (cytotoxicity) and in the cells using a Roche LDH release assay as per the product protocol. n = 2.

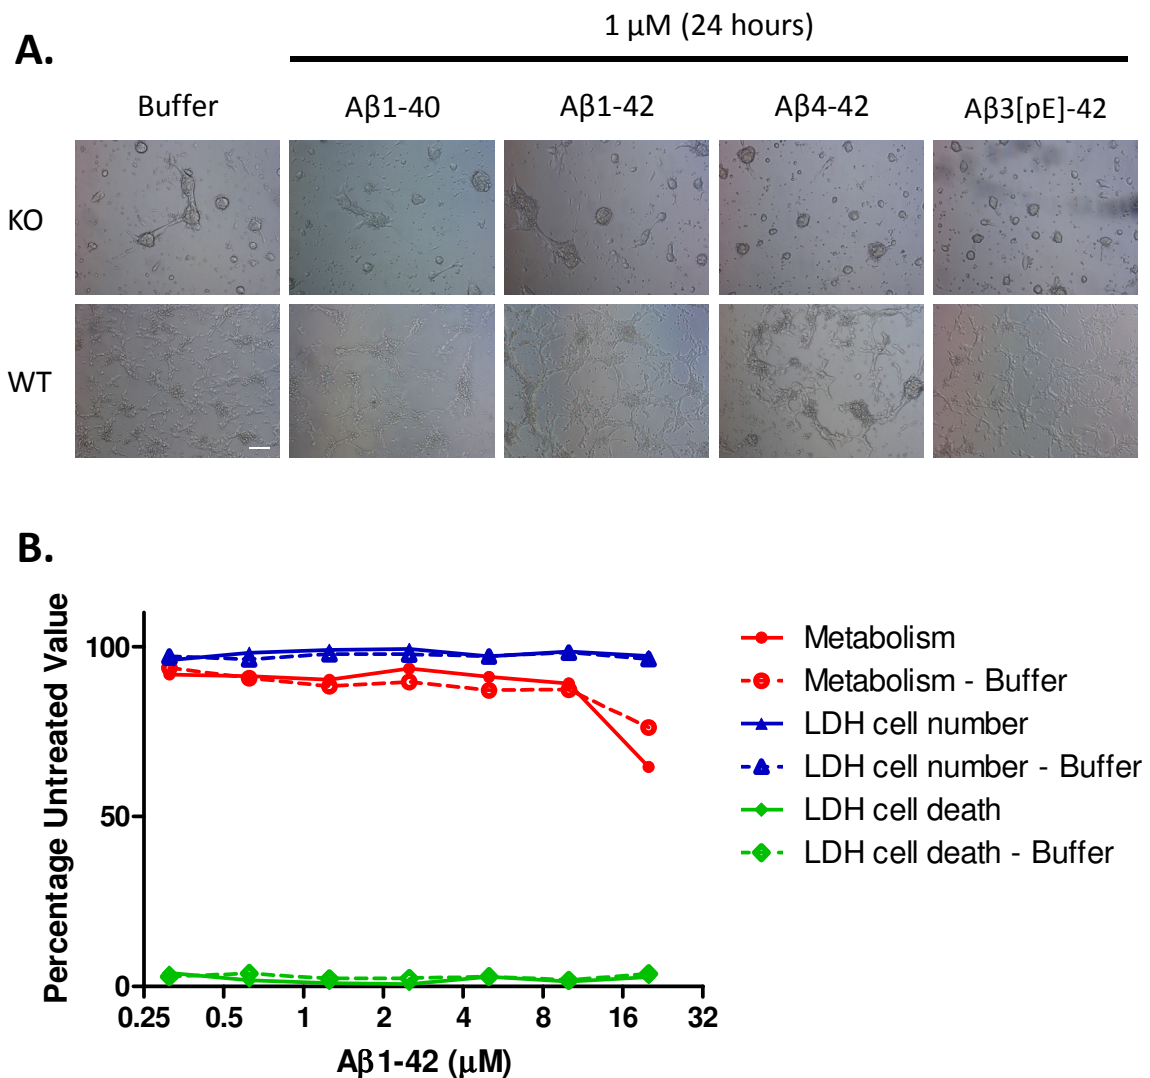

Supplement: 13287_2015_67_MOESM2_ESM.pdf [file 13287_2015_67_MOESM2_ESM.pdf]
