# Supplementary material for: The prion protein regulates beta-amyloid-mediated self-renewal of neural stem cells in vitro
Source: PubMed Central journal article supplement (PMC4435829; doi:10.1186/s13287-015-0067-4), 2015-04-11
Supplement: 13287_2015_67_MOESM7_ESM.pdf [file 13287_2015_67_MOESM7_ESM.pdf]

**Additional file 7: Statistical analyses of A $\beta$  data presented in Figure 1 and additional file 2.**

ns = not significant, TG = Tga20.

| Test                                                                        | Comparison             | A $\beta$ 1-40 | A $\beta$ 1-42 | A $\beta$ 4-42 | A $\beta$ 3[pE]-42 |
|-----------------------------------------------------------------------------|------------------------|----------------|----------------|----------------|--------------------|
| Neurosphere volume - Fig 1B<br>2-way ANOVA, F = 53.75, p < 0.001, n = 4     | KO A $\beta$ vs buffer | P < 0.05       | P < 0.05       | ns             | P < 0.001          |
|                                                                             | WT A $\beta$ vs buffer | P < 0.01       | P < 0.05       | P < 0.05       | ns                 |
|                                                                             | KO vs WT               | P < 0.001      | P < 0.001      | P < 0.01       | P < 0.001          |
|                                                                             | TG A $\beta$ vs Buffer | ns             | ns             | ns             | P < 0.05           |
|                                                                             | KO vs TG               | P < 0.001      | P < 0.001      | P < 0.05       | P < 0.001          |
|                                                                             | WT vs TG               | Ns             | ns             | ns             | ns                 |
| Neurosphere diameter - Fig 1C<br>2-way ANOVA, F = 63.43, p < 0.001, n = 4   | KO A $\beta$ vs buffer | ns             | P < 0.05       | ns             | P < 0.01           |
|                                                                             | WT A $\beta$ vs buffer | P < 0.01       | P < 0.001      | P < 0.01       | P < 0.05           |
|                                                                             | KO vs WT               | P < 0.001      | P < 0.001      | P < 0.01       | P < 0.001          |
|                                                                             | TG A $\beta$ vs Buffer | P < 0.001      | P < 0.001      | P < 0.001      | P < 0.001          |
|                                                                             | KO vs TG               | P < 0.001      | P < 0.001      | P < 0.001      | P < 0.001          |
|                                                                             | WT vs TG               | Ns             | ns             | ns             | ns                 |
| Neurosphere colonies - Fig 1D<br>2-way ANOVA, F = 9.647, p < 0.001, n = 4   | KO A $\beta$ vs buffer | ns             | ns             | ns             | P < 0.05           |
|                                                                             | WT A $\beta$ vs buffer | ns             | P < 0.05       | ns             | ns                 |
|                                                                             | KO vs WT               | ns             | ns             | ns             | ns                 |
|                                                                             | TG A $\beta$ vs Buffer | P < 0.05       | P < 0.001      | P < 0.001      | P < 0.05           |
|                                                                             | KO vs TG               | ns             | ns             | P < 0.001      | P < 0.05           |
|                                                                             | WT vs TG               | ns             | ns             | P < 0.01       | ns                 |
| Cell cycle G0/G1 phase - Fig 1F<br>2-way ANOVA, F = 22.99, p = 0.003, n = 4 | KO A $\beta$ vs buffer | --             | P < 0.05       | --             | --                 |
|                                                                             | WT A $\beta$ vs buffer | --             | ns             | --             | --                 |
|                                                                             | KO vs WT               | --             | P < 0.05       | --             | --                 |
| Cell cycle S phase - Fig 1F<br>2-way ANOVA, F = 39.18, p = 0.0033, n = 4    | KO A $\beta$ vs buffer | --             | ns             | --             | --                 |
|                                                                             | WT A $\beta$ vs buffer | --             | ns             | --             | --                 |
|                                                                             | KO vs WT               | --             | P < 0.01       | --             | --                 |

|                                                                             |                        |    |               |    |    |
|-----------------------------------------------------------------------------|------------------------|----|---------------|----|----|
| Cell cycle G2/M phase - Fig 1F<br>2-way ANOVA, F = 24.91, p = 0.0025, n = 4 | KO A $\beta$ vs buffer | -- | P < 0.05      | -- | -- |
|                                                                             | WT A $\beta$ vs buffer | -- | ns            | -- | -- |
|                                                                             | KO vs WT               | -- | P < 0.01      | -- | -- |
| <b>Test</b>                                                                 | <b>Comparison</b>      |    | <b>Result</b> |    |    |
| Neurosphere volume<br>2-way ANOVA, F = 7.48, p = 0.006, n = 4               | KO vs WT (untreated)   |    | P < 0.05      |    |    |
|                                                                             | KO vs TG (untreated)   |    | P < 0.05      |    |    |
|                                                                             | WT vs TG (untreated)   |    | ns            |    |    |
|                                                                             | KO untreated vs buffer |    | ns            |    |    |
|                                                                             | WT untreated vs buffer |    | ns            |    |    |
|                                                                             | TG untreated vs buffer |    | ns            |    |    |
| Neurosphere diameter<br>2-way ANOVA, F = 10.01, p = 0.003, n = 4            | KO vs WT (untreated)   |    | P < 0.05      |    |    |
|                                                                             | KO vs TG (untreated)   |    | ns            |    |    |
|                                                                             | WT vs TG (untreated)   |    | ns            |    |    |
|                                                                             | KO untreated vs buffer |    | ns            |    |    |
|                                                                             | WT untreated vs buffer |    | ns            |    |    |
|                                                                             | TG untreated vs buffer |    | ns            |    |    |
| Neurosphere colonies<br>2-way ANOVA, F = 22.13, p < 0.001, n = 4            | KO vs WT (untreated)   |    | P < 0.01      |    |    |
|                                                                             | KO vs TG (untreated)   |    | ns            |    |    |
|                                                                             | WT vs TG (untreated)   |    | P < 0.001     |    |    |
|                                                                             | KO untreated vs buffer |    | ns            |    |    |
|                                                                             | WT untreated vs buffer |    | ns            |    |    |
|                                                                             | TG untreated vs buffer |    | ns            |    |    |
